# Supplementary material for: Circular RNA hsa_circ_0004689 (circSWT1) promotes NSCLC progression via the miR‐370‐3p/SNAIL axis by inducing cell epithelial‐mesenchymal transition (EMT)
Source: PubMed Central journal article supplement (PMC10134258; doi:10.1002/cam4.5527), 2022-12-19

Figure S1

A

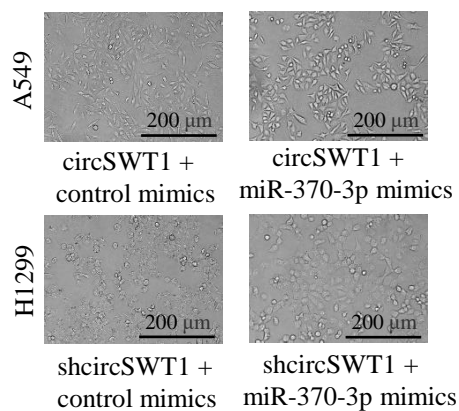

B

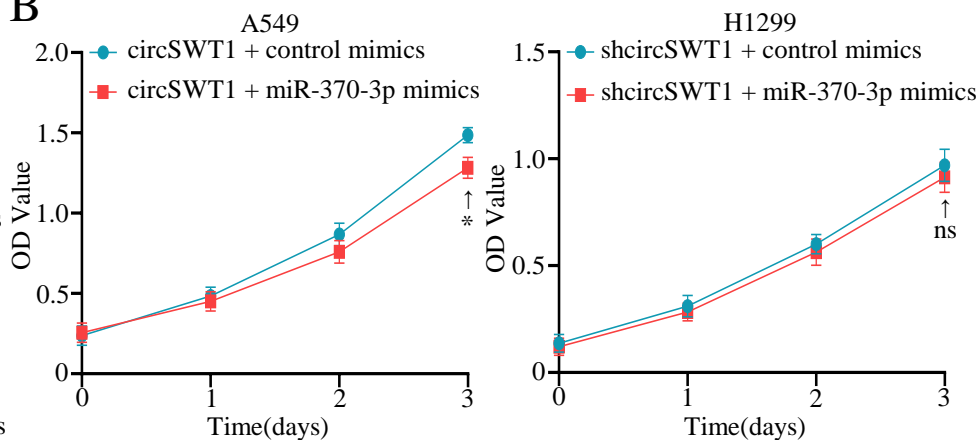

C

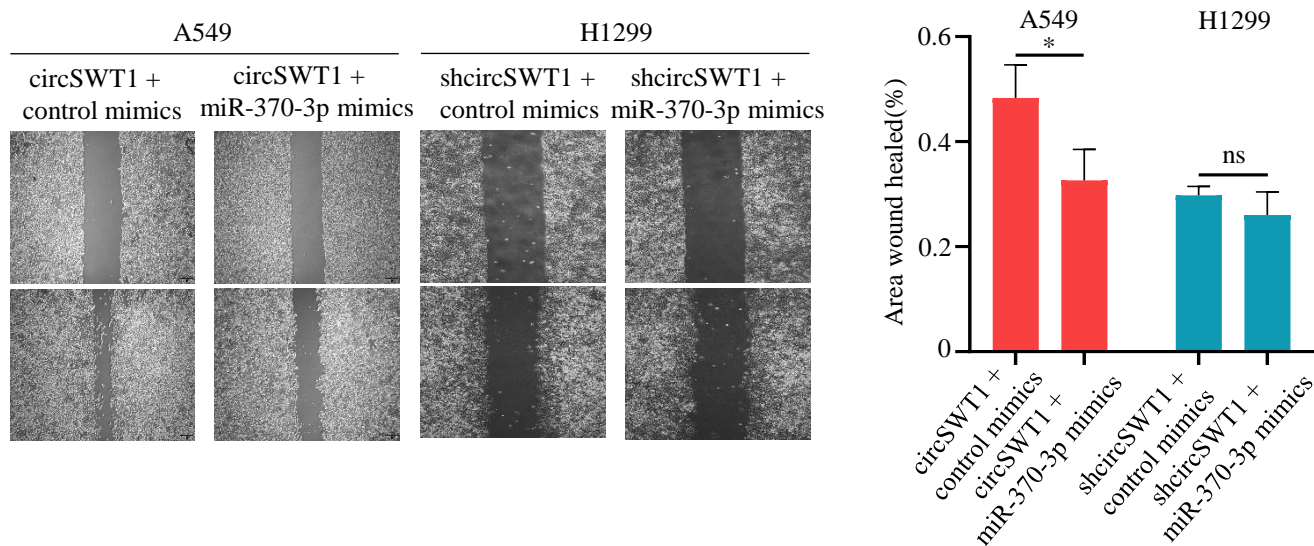

D

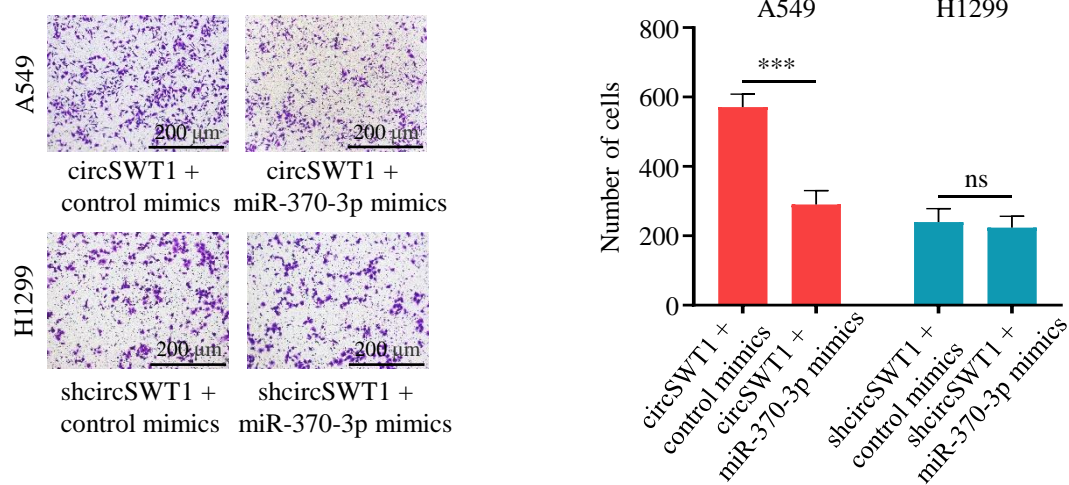

Supplement: CAM4-12-8289-s003.pdf [file CAM4-12-8289-s003.pdf]
